# Supplementary material for: Application of the Ipswich Touch Test for diabetic peripheral neuropathy screening: a systematic review and meta-analysis
Source: PubMed Central journal article supplement — BMJ Open. 2021 Oct 3;11(10):e046966. doi: 10.1136/bmjopen-2020-046966 (PMC8491285; doi:10.1136/bmjopen-2020-046966), 2021-10-03
Supplement: bmjopen-2020-046966supp001.pdf [file bmjopen-2020-046966supp001.pdf]

Mononeuropathies[Title/Abstract])) OR (Mononeuropathies, Diabetic[Title/Abstract])) OR (Mononeuropathy, Diabetic[Title/Abstract])) OR (Diabetic Mononeuropathy Simplex[Title/Abstract])) OR (Diabetic Mononeuropathy Simplicies[Title/Abstract])) OR (Mononeuropathy Simplex, Diabetic[Title/Abstract])) OR (Mononeuropathy Simplicies, Diabetic[Title/Abstract])) OR (Simplex, Diabetic Mononeuropathy[Title/Abstract])) OR (Simplicies, Diabetic Mononeuropathy[Title/Abstract])) OR (Diabetic Polyneuropathy[Title/Abstract])) OR (Diabetic Polyneuropathies[Title/Abstract])) OR (Polyneuropathies, Diabetic[Title/Abstract])) OR (Polyneuropathy, Diabetic[Title/Abstract])) OR ("Diabetes Complications"[Mesh])) OR (((((((Diabetes-Related Complications[Title/Abstract])) OR (Diabetes Related Complications[Title/Abstract])) OR (Diabetes-Related Complication[Title/Abstract])) OR (Diabetic Complications[Title/Abstract])) OR (Diabetic Complication[Title/Abstract])) OR (Complications of Diabetes Mellitus[Title/Abstract])) OR (Diabetes Mellitus Complication[Title/Abstract])) OR (Diabetes Mellitus Complications[Title/Abstract])) OR ("Diabetic Foot"[Mesh])) OR (((Foot, Diabetic[Title/Abstract])) OR (Diabetic Feet[Title/Abstract])) OR (Feet, Diabetic[Title/Abstract])) OR (Foot Ulcer, Diabetic[Title/Abstract]))

#11 Search: (((((((("Diabetes Mellitus"[Mesh]) OR (((Diabetes[Title/Abstract]) OR (Diabetes, Type 2[Title/Abstract])) OR (Type 2 Diabetes Mellitus[Title/Abstract])) OR (Diabetes Mellitus, Type II[Title/Abstract])) OR (Diabetes Mellitus, Type 1[Title/Abstract])) OR ("Diabetic Neuropathies"[Mesh])) OR (((((((((((((((((((((((((((((((Diabetic Neuropathy[Title/Abstract]) OR (Neuropathies, Diabetic[Title/Abstract])) OR (Neuropathy, Diabetic[Title/Abstract])) OR (Diabetic Autonomic Neuropathy[Title/Abstract])) OR (Autonomic Neuropathies, Diabetic[Title/Abstract])) OR (Diabetic Autonomic Neuropathies[Title/Abstract])) OR (Neuropathies, Diabetic Autonomic[Title/Abstract])) OR (Autonomic Neuropathy, Diabetic[Title/Abstract])) OR (Neuropathy, Diabetic Autonomic[Title/Abstract])) OR (Symmetric Diabetic Proximal Motor Neuropathy[Title/Abstract])) OR (Asymmetric Diabetic Proximal Motor Neuropathy[Title/Abstract])) OR (Diabetic Asymmetric Polyneuropathy[Title/Abstract])) OR

(Asymmetric Polyneuropathies, Diabetic[Title/Abstract])) OR (Asymmetric Polyneuropathy, Diabetic[Title/Abstract])) OR (Diabetic Asymmetric Polyneuropathies[Title/Abstract])) OR (Polyneuropathies, Diabetic Asymmetric[Title/Abstract])) OR (Polyneuropathy, Diabetic Asymmetric[Title/Abstract])) OR (Diabetic Mononeuropathy[Title/Abstract])) OR (Diabetic Mononeuropathies[Title/Abstract])) OR (Mononeuropathies, Diabetic[Title/Abstract])) OR (Mononeuropathy, Diabetic[Title/Abstract])) OR (Diabetic Mononeuropathy Simplex[Title/Abstract])) OR (Diabetic Mononeuropathy Simplicies[Title/Abstract])) OR (Mononeuropathy Simplex, Diabetic[Title/Abstract])) OR (Mononeuropathy Simplicies, Diabetic[Title/Abstract])) OR (Simplex, Diabetic Mononeuropathy[Title/Abstract])) OR (Simplicies, Diabetic Mononeuropathy[Title/Abstract])) OR (Diabetic Polyneuropathy[Title/Abstract])) OR (Diabetic Polyneuropathies[Title/Abstract])) OR (Polyneuropathies, Diabetic[Title/Abstract])) OR (Polyneuropathy, Diabetic[Title/Abstract])) OR ("Diabetes Complications"[Mesh])) OR (((((((Diabetes-Related Complications[Title/Abstract]) OR (Diabetes Related Complications[Title/Abstract])) OR (Diabetes-Related Complication[Title/Abstract])) OR (Diabetic Complications[Title/Abstract])) OR (Diabetic Complication[Title/Abstract])) OR (Complications of Diabetes Mellitus[Title/Abstract])) OR (Diabetes Mellitus Complication[Title/Abstract])) OR (Diabetes Mellitus Complications[Title/Abstract])) OR ("Diabetic Foot"[Mesh])) OR (((Foot, Diabetic[Title/Abstract]) OR (Diabetic Feet[Title/Abstract])) OR (Feet, Diabetic[Title/Abstract])) OR (Foot Ulcer, Diabetic[Title/Abstract])) AND (((ipswich touch test[Title/Abstract]) OR (touch test[Title/Abstract])) OR (IPTT[Title/Abstract]))

### Embase Search Strategy

#1 'diabetes mellitus'/exp

#2 'diabetes, type 2':ab,ti OR 'type 2 diabetes mellitus':ab,ti OR 'diabetes mellitus, type ii':ab,ti OR 'diabetes mellitus, type 1':ab,ti

#3 #1 OR #2

#4 'diabetic neuropathy'/exp

#5 'diabetic neuropathy':ab,ti OR 'neuropathies, diabetic':ab,ti OR 'neuropathy, diabetic':ab,ti OR 'diabetic autonomic neuropathy':ab,ti OR 'autonomic neuropathies, diabetic':ab,ti OR 'autonomic neuropathy, diabetic':ab,ti OR 'diabetic autonomic neuropathies':ab,ti OR 'neuropathies, diabetic autonomic':ab,ti OR 'neuropathy, diabetic autonomic':ab,ti OR 'symmetric diabetic proximal motor neuropathy':ab,ti OR 'asymmetric diabetic proximal motor neuropathy':ab,ti OR 'diabetic asymmetric polyneuropathy':ab,ti OR 'asymmetric polyneuropathies, diabetic':ab,ti OR 'asymmetric polyneuropathy, diabetic':ab,ti OR 'diabetic asymmetric polyneuropathies':ab,ti OR 'polyneuropathies, diabetic asymmetric':ab,ti OR 'polyneuropathy, diabetic asymmetric':ab,ti OR 'diabetic mononeuropathy':ab,ti OR 'diabetic mononeuropathies':ab,ti OR 'mononeuropathies, diabetic':ab,ti OR 'mononeuropathy, diabetic':ab,ti OR 'diabetic mononeuropathy simplex':ab,ti OR 'diabetic mononeuropathy simplices':ab,ti OR 'mononeuropathy simplex, diabetic':ab,ti OR 'mononeuropathy simplices, diabetic':ab,ti OR 'simplex, diabetic mononeuropathy':ab,ti OR 'simplices, diabetic mononeuropathy':ab,ti OR 'diabetic polyneuropathy':ab,ti OR 'diabetic polyneuropathies':ab,ti OR 'polyneuropathies, diabetic':ab,ti OR 'polyneuropathy, diabetic':ab,ti

#6 #4 OR #5

#7 'diabetic complication'/exp

#8 'diabetes complication':ab,ti OR 'diabetes-related complications':ab,ti OR 'diabetes related complications':ab,ti OR 'diabetes-related complication':ab,ti OR 'diabetic complications':ab,ti OR 'diabetic complication':ab,ti OR 'complications of diabetes mellitus':ab,ti OR 'diabetes mellitus complication':ab,ti OR 'diabetes mellitus complications':ab,ti

#9 #7 OR #8

#10 'diabetic foot'/exp

#11 'diabetic foot':ab,ti OR 'diabetic feet':ab,ti OR 'feet, diabetic':ab,ti OR 'foot ulcer,

diabetic':ab,ti OR 'foot ulcer':ab,ti

#12 #10 OR #11

#13 #3 OR #6 OR #9 OR #12

#14 'ipswich touch test':ab,ti OR 'touch test':ab,ti OR 'iptt':ab,ti

#15 #13 AND #14

### **Cochrane Library Search Strategy**

#1 MeSH descriptor: [Diabetes Mellitus] explode all trees 31055

#2 (Diabetes):ti,ab,kw OR (Diabetes, Type 2):ti,ab,kw OR (Type 2 Diabetes Mellitus):ti,ab,kw OR (Diabetes Mellitus, Type II):ti,ab,kw OR (Diabetes Mellitus, Type 1)

#3 MeSH descriptor: [Diabetic Neuropathies] explode all trees

#4 (Diabetic Neuropathy):ti,ab,kw OR (Neuropathies, Diabetic):ti,ab,kw OR (Neuropathy, Diabetic):ti,ab,kw OR (Diabetic Autonomic Neuropathy):ti,ab,kw OR (Autonomic Neuropathies, Diabetic):ti,ab,kw OR (Autonomic Neuropathy, Diabetic):ti,ab,kw OR (Diabetic Autonomic Neuropathies):ti,ab,kw OR (Neuropathies, Diabetic Autonomic):ti,ab,kw OR (Neuropathy, Diabetic Autonomic):ti,ab,kw OR (Symmetric Diabetic Proximal Motor Neuropathy):ti,ab,kw OR (Asymmetric Diabetic Proximal Motor Neuropathy):ti,ab,kw OR (Diabetic Asymmetric Polyneuropathy):ti,ab,kw OR (Asymmetric Polyneuropathies, Diabetic):ti,ab,kw OR (Asymmetric Polyneuropathy, Diabetic):ti,ab,kw OR (Diabetic Asymmetric Polyneuropathies):ti,ab,kw OR (Polyneuropathies, Diabetic Asymmetric):ti,ab,kw OR (Polyneuropathy, Diabetic Asymmetric):ti,ab,kw OR (Diabetic Mononeuropathy):ti,ab,kw OR (Diabetic Mononeuropathies):ti,ab,kw OR (Mononeuropathies, Diabetic):ti,ab,kw OR (Mononeuropathy, Diabetic):ti,ab,kw OR (Diabetic Mononeuropathy Simplex):ti,ab,kw OR (Diabetic Mononeuropathy Simplices):ti,ab,kw OR (Mononeuropathy Simplex, Diabetic):ti,ab,kw OR (Mononeuropathy Simplices, Diabetic):ti,ab,kw OR (Simplex, Diabetic Mononeuropathy):ti,ab,kw OR

(Simplices, Diabetic Mononeuropathy):ti,ab,kw OR (Diabetic Polyneuropathy):ti,ab,kw OR  
(Diabetic Polyneuropathies):ti,ab,kw OR (Polyneuropathies, Diabetic):ti,ab,kw OR  
(Polyneuropathy, Diabetic):ti,ab,kw 3653

#5 MeSH descriptor: [Diabetes Complications] explode all trees

#6 (Diabetes-Related Complications):ti,ab,kw OR (Diabetes Related  
Complications):ti,ab,kw OR (Diabetes-Related Complication):ti,ab,kw OR (Diabetic  
Complications):ti,ab,kw OR (Diabetic Complication):ti,ab,kw OR (Complications of Diabetes  
Mellitus):ti,ab,kw OR (Diabetes Mellitus Complication):ti,ab,kw OR (Diabetes Mellitus  
Complications)

#7 MeSH descriptor: [Diabetic Foot] explode all trees

#8 (Diabetic Feet):ti,ab,kw OR (Feet, Diabetic):ti,ab,kw OR (Foot Ulcer, Diabetic)

#9 (ipswich touch test):ti,ab,kw OR (touch test):ti,ab,kw OR (IPTT)

#10 #1 OR #2 OR #3 OR #4 OR #5 OR #6 OR #7 OR #8

#11 #9 AND #10

### **Web of Science Search Strategy**

#1 TS=(Diabetes Mellitus or Diabetes or Diabetes, Type 2 or Type 2 Diabetes Mellitus or  
Diabetes Mellitus, Type II or Diabetes Mellitus, Type 1)

#2 TS=( Diabetic Neuropathies or Diabetic Neuropathy or Neuropathies, Diabetic or  
Neuropathy, Diabetic or Diabetic Autonomic Neuropathy or Autonomic Neuropathies,  
Diabetic or Autonomic Neuropathy, Diabetic or Diabetic Autonomic Neuropathies or  
Neuropathies, Diabetic Autonomic or Neuropathy, Diabetic Autonomic or Symmetric  
Diabetic Proximal Motor Neuropathy or Asymmetric Diabetic Proximal Motor Neuropathy or  
Diabetic Asymmetric Polyneuropathy or Asymmetric Polyneuropathies, Diabetic or  
Asymmetric Polyneuropathy, Diabetic or Diabetic Asymmetric Polyneuropathies or

Polyneuropathies, Diabetic Asymmetric or Polyneuropathy, Diabetic Asymmetric or Diabetic Mononeuropathy or Diabetic Mononeuropathies or Mononeuropathies, Diabetic or Mononeuropathy, Diabetic or Diabetic Mononeuropathy Simplex or Diabetic Mononeuropathy Simplicis or Mononeuropathy Simplex, Diabetic or Mononeuropathy Simplicis, Diabetic or Simplex, Diabetic Mononeuropathy or Simplicis, Diabetic Mononeuropathy or Diabetic Polyneuropathy or Diabetic Polyneuropathies or Polyneuropathies, Diabetic or Polyneuropathy, Diabetic)

#3 TS=(Diabetes Complications or Diabetes Complication or Diabetes-Related Complications or Diabetes Related Complications or Diabetes-Related Complication or Diabetic Complications or Diabetic Complication or Complications of Diabetes Mellitus or Diabetes Mellitus Complication or Diabetes Mellitus Complications)

#4 TS=(Diabetic Foot or Foot, Diabetic or Diabetic Feet or Feet, Diabetic or Foot Ulcer, Diabetic)

#5 #4 OR #3 OR #2 OR #1

#6 TS=(ipswich touch test or touch test or IPTT)

#7 #6 AND #5

### China National Knowledge Infrastructure (CNKI) Search Strategy

检索式 A: (((主题=糖尿病 或者 题名=糖尿病 或者 v\_subject=中英文扩展(糖尿病) 或者 title=中英文扩展(糖尿病)) 或者 (主题=糖尿病足 或者 题名=糖尿病足 或者 v\_subject=中英文扩展(糖尿病足) 或者 title=中英文扩展(糖尿病足))) 或者 ((主题=糖尿病周围神经病变 或者 题名=糖尿病周围神经病变 或者 v\_subject=中英文扩展(糖尿病周围神经病变) 或者 title=中英文扩展(糖尿病周围神经病变)) 或者 (主题=糖尿病并发症 或者 题名=糖尿病并发症 或者 v\_subject=中英文扩展(糖尿病并发症) 或者 title=中英文扩展(糖尿病并发症)))) 并且 (((主题=中英文扩展(touch test) 或者 题名=中英文扩展(touch test) 或者 v\_subject=touch test 或者 title=touch test) 或者 (主题=中英文扩展(Ipswich Touch Test) 或者 题名=中英文扩展(Ipswich Touch Test) 或者

v\_subject=Ipswich Touch Test 或者 title=Ipswich Touch Test) ) 或者 ((主题=伊普斯维奇触摸测试 或者 题名=伊普斯维奇触摸测试 或者 v\_subject=中英文扩展(伊普斯维奇触摸测试) 或者 title=中英文扩展(伊普斯维奇触摸测试)) 或者 (主题=中英文扩展(IPTT) 或者 题名=中英文扩展(IPTT) 或者 v\_subject=IPTT 或者 title=IPTT)) ) 或者 ((关键词=轻触 或者 keyword=中英文扩展(轻触)) 或者 (关键词=轻触测试 或者 keyword=中英文扩展(轻触测试))) ) 或者 ((题名=触摸 或者 Title=中英文扩展(触摸)) 或者 (题名=触摸测试 或者 Title=中英文扩展(触摸测试))) ) (模糊匹配)

### Wan Fang Database Search Strategy

主题:((糖尿病)+主题:(糖尿病足)+主题:(糖尿病周围神经病变)+全部:(糖尿病并发症))\*主题:((touch test)+主题:(IPTT)+主题:(Ipswich Touch Test)+全部:(伊普斯维奇触摸测试))

### China Biology Medicine disc (CBM) Search Strategy

#1 "糖尿病"[不加权:扩展]

#2 "糖尿病足"[常用字段:智能]

#3 "糖尿病神经病变"[常用字段:智能]

#4 "糖尿病并发症"[常用字段:智能]

#5 (#4) OR (#3) OR (#2) OR (#1)

#6 "touch"[常用字段:智能] AND "test"[常用字段:智能]

#7 "IPTT"[常用字段:智能]

#8 "Ipswich"[常用字段:智能] AND "Touch"[常用字段:智能] AND "Test"[常用字段:智能]

#9 "伊普斯维奇触摸测试"[常用字段:智能]

#10 "轻触"[常用字段:智能]

#11 "轻触测试"[常用字段:智能]

#12 "触摸"[常用字段:智能]

#13 "触摸测试"[常用字段:智能]

#14 (#13) OR (#12) OR (#11) OR (#10) OR (#9) OR (#8) OR (#7) OR (#6)

#15 (#14) AND (#5)
