# Supplementary material for: Application of the Ipswich Touch Test for diabetic peripheral neuropathy screening: a systematic review and meta-analysis
Source: PubMed Central journal article supplement — BMJ Open. 2021 Oct 3;11(10):e046966. doi: 10.1136/bmjopen-2020-046966 (PMC8491285; doi:10.1136/bmjopen-2020-046966), 2021-10-03
Supplement: bmjopen-2020-046966supp002.pdf [file bmjopen-2020-046966supp002.pdf]

```
. diagma tp fp fn tn, qe(qi)
```

Input form: TP FP FN TN assumed

Note: Weights are from Doi's quality effects model

Studies included: 6

Participants included: 1493

Prevalence of disease: 19.7%

Heterogeneity (I-squared): 40.5%

Pub bias (LFK index): -1.7, minor asymmetry

|             | Estimate | 95% Conf. Interval |         |
|-------------|----------|--------------------|---------|
| <b>Sens</b> | .77      | .688               | .836    |
| <b>Spec</b> | .957     | .928               | .975    |
| <b>LR+</b>  | 18.064   | 10.748             | 30.358  |
| <b>LR-</b>  | .24      | .167               | .346    |
| <b>DOR</b>  | 75.239   | 39.898             | 141.887 |
| <b>AUC</b>  | .897     | .863               | .923    |

The results of sensitivity and specificity of IPTT in the diagnosis of DPN
